# Supplementary material for: mTOR inhibition suppresses salinomycin-induced ferroptosis in breast cancer stem cells by ironing out mitochondrial dysfunctions
Source: PubMed Central journal article supplement (PMC10651934; doi:10.1038/s41419-023-06262-5), 2023-11-15

Figure S1 - related to Fig 1

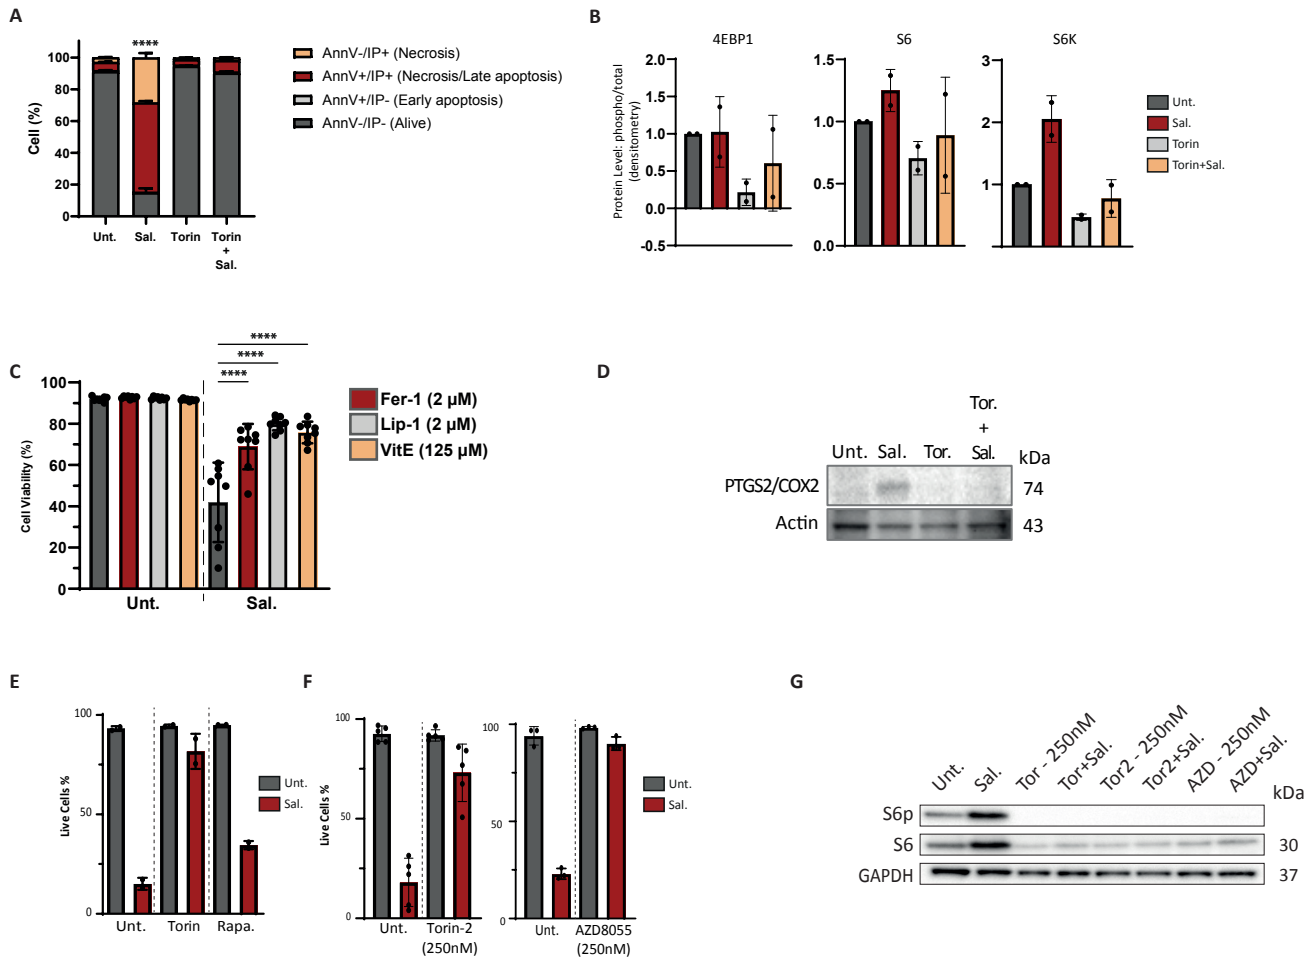

**Figure S2 - related to Fig 2**

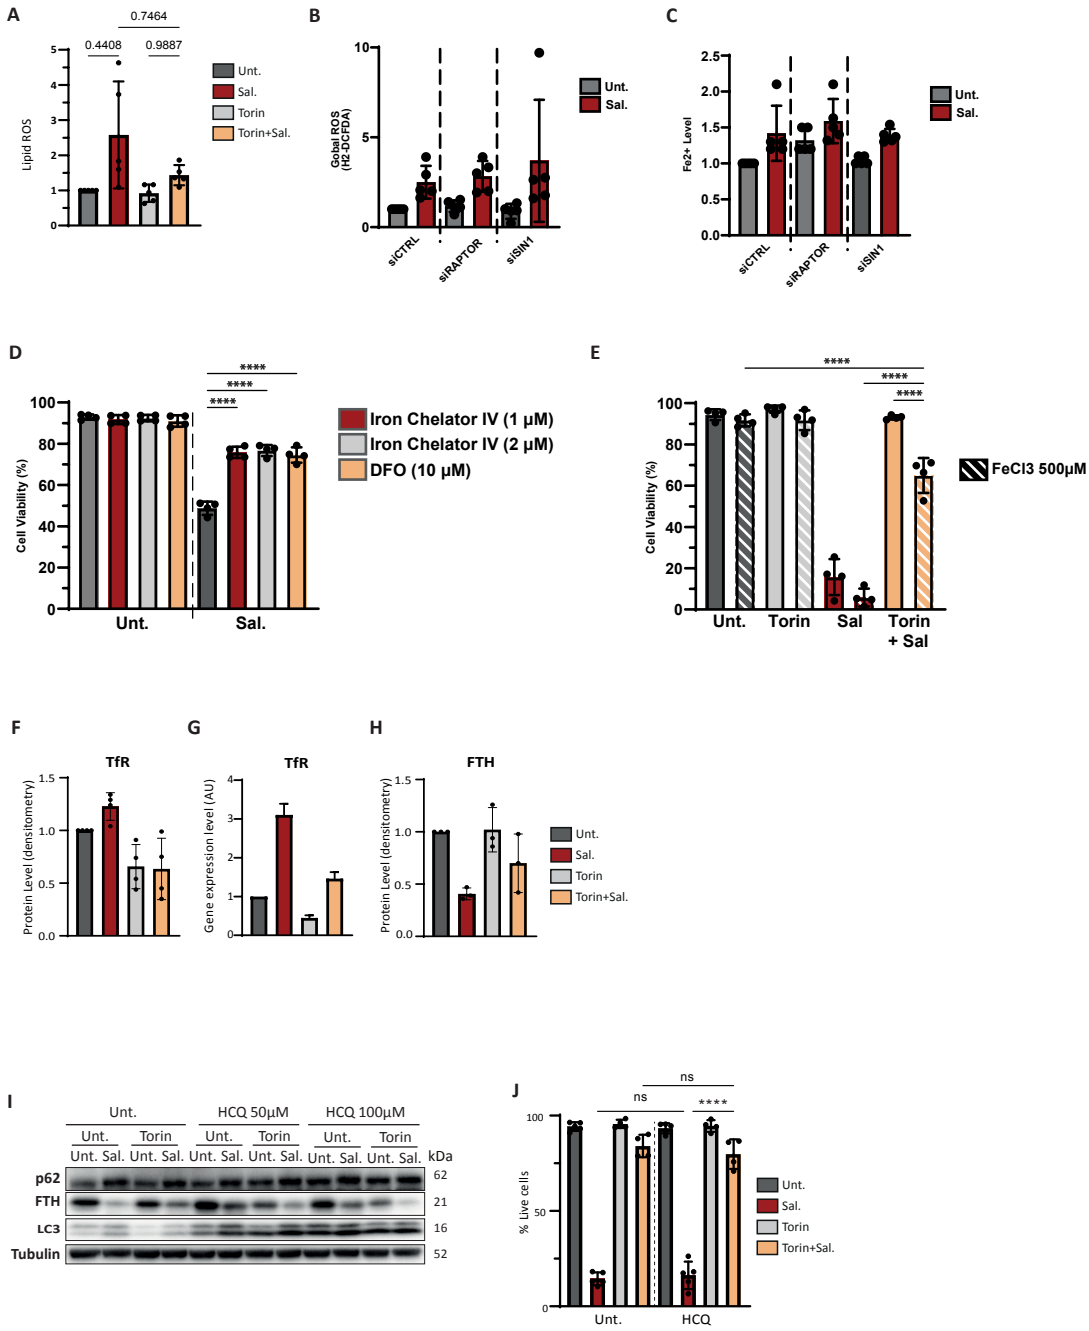

Figure S3 - related to Fig 3

GO: MF enrichment

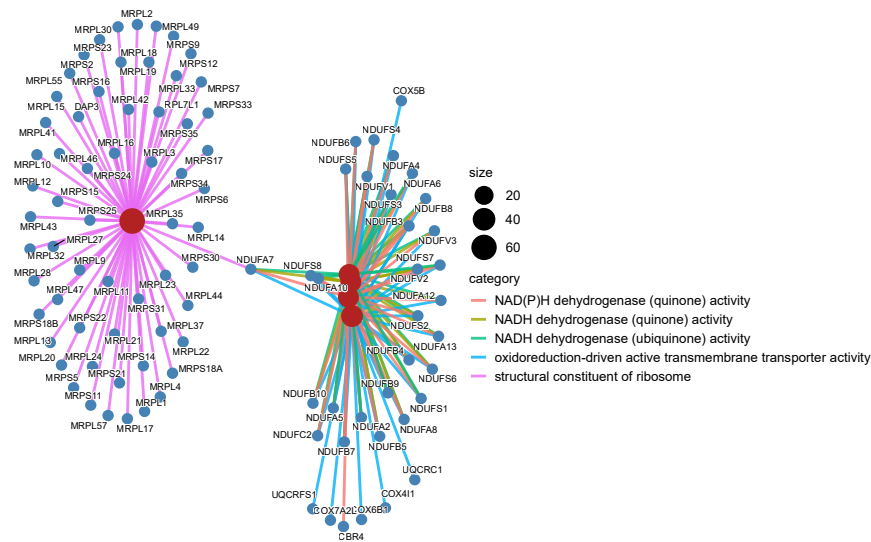

GO: CC enrichment

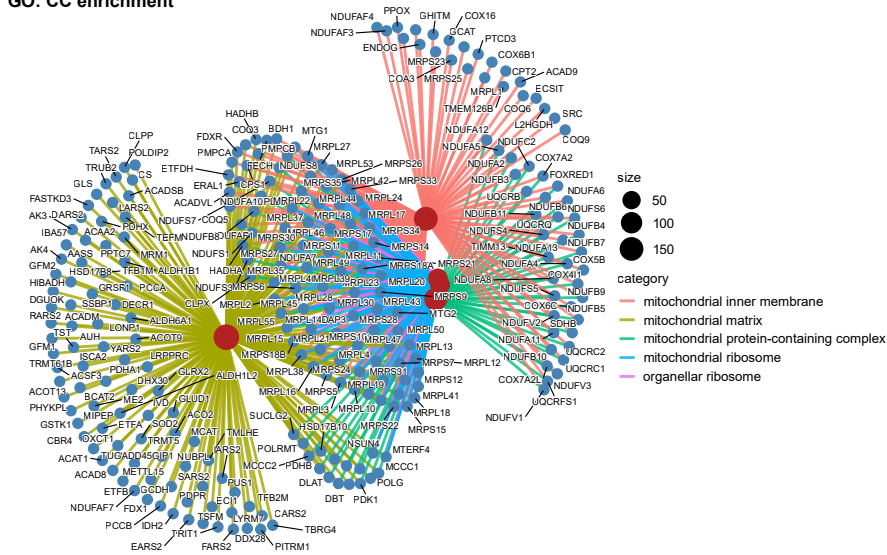

GO: BP enrichment

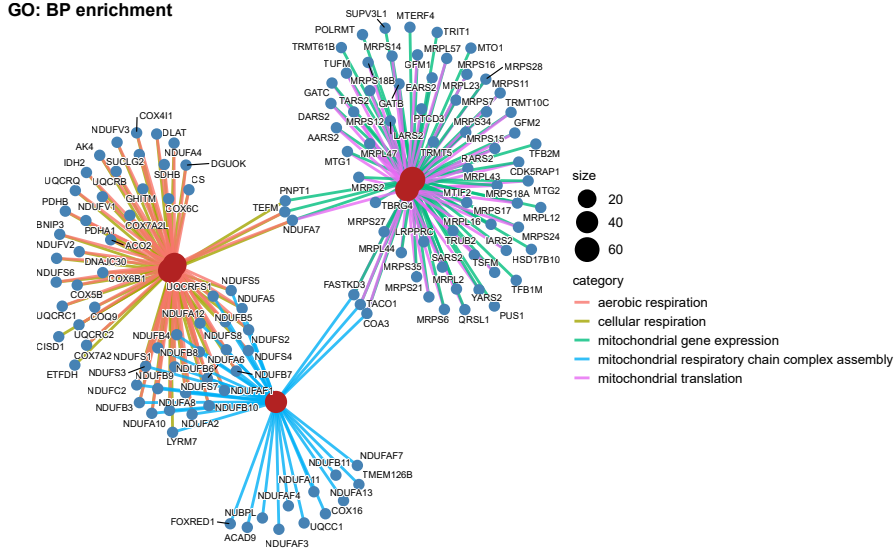

Figure S4 - related to Fig 3

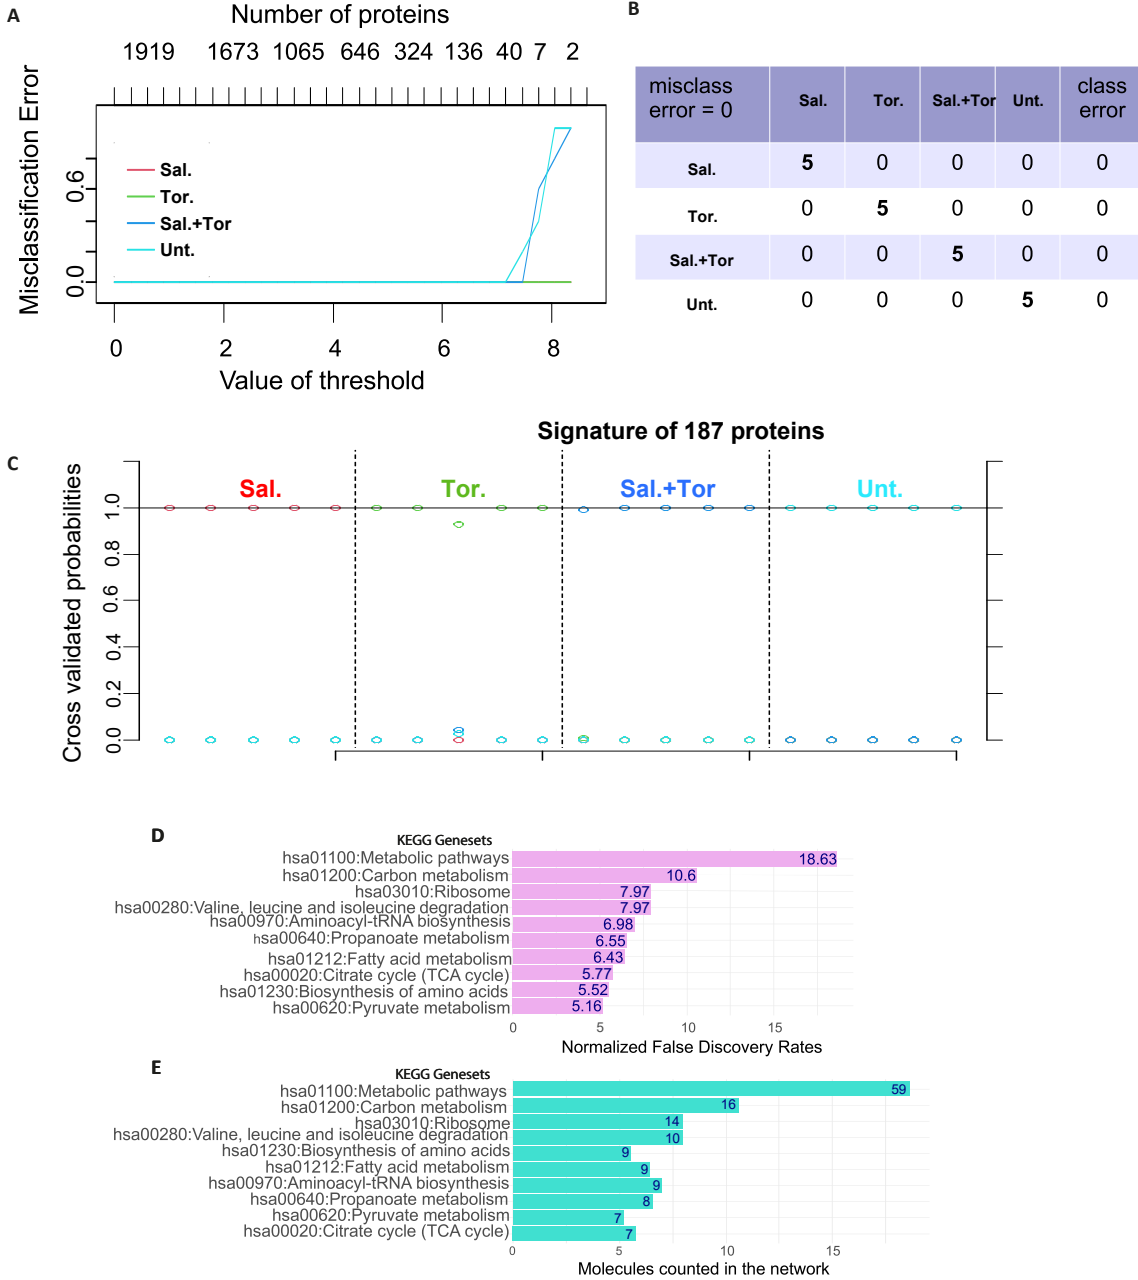

Figure S5 - related to Fig 3

A

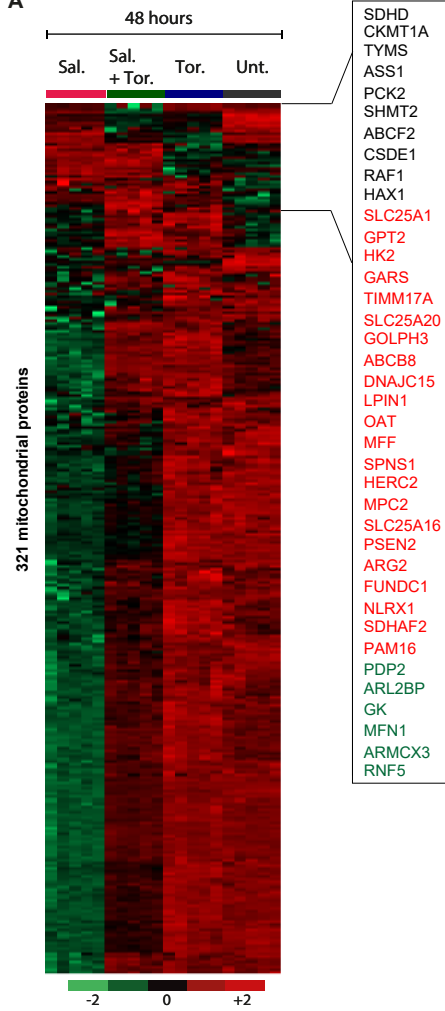

B

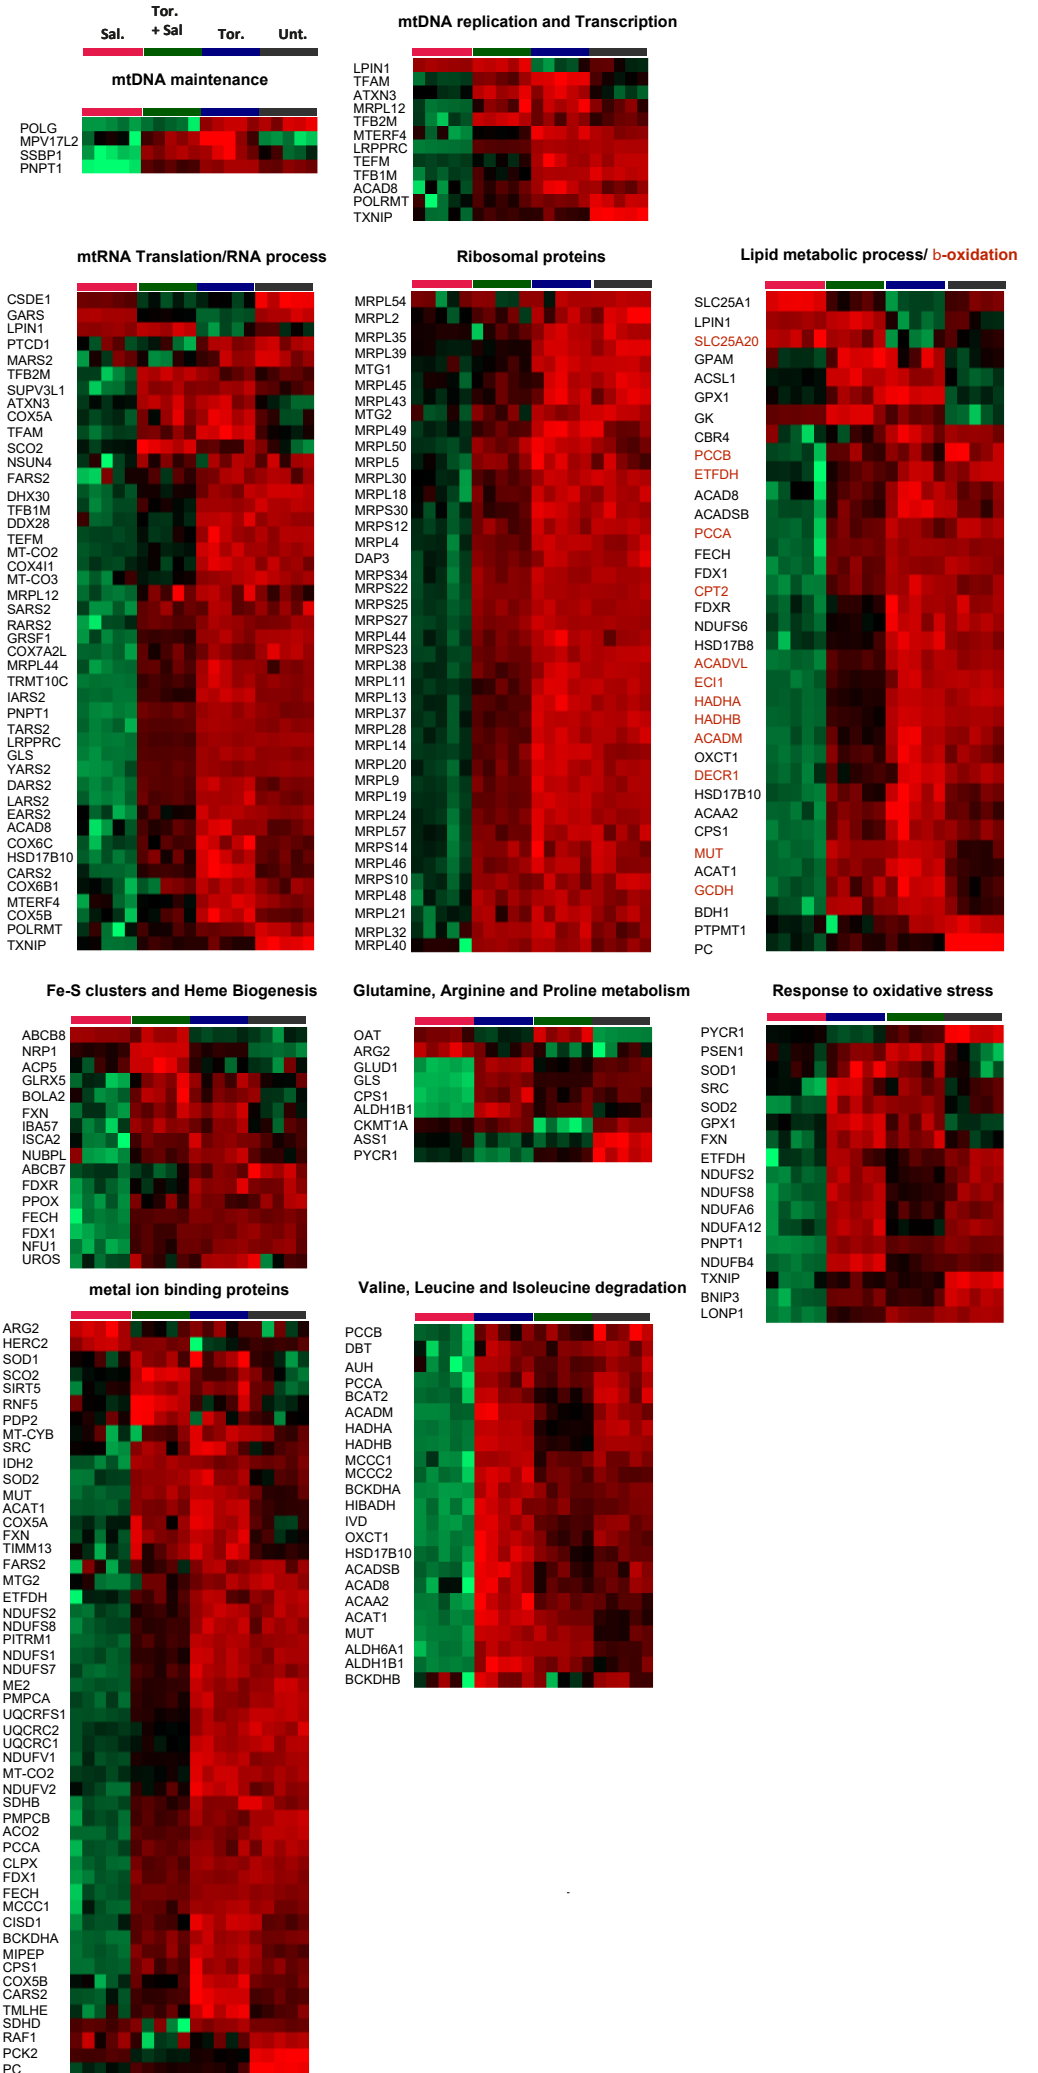

**Figure S6 - related to Fig 5**

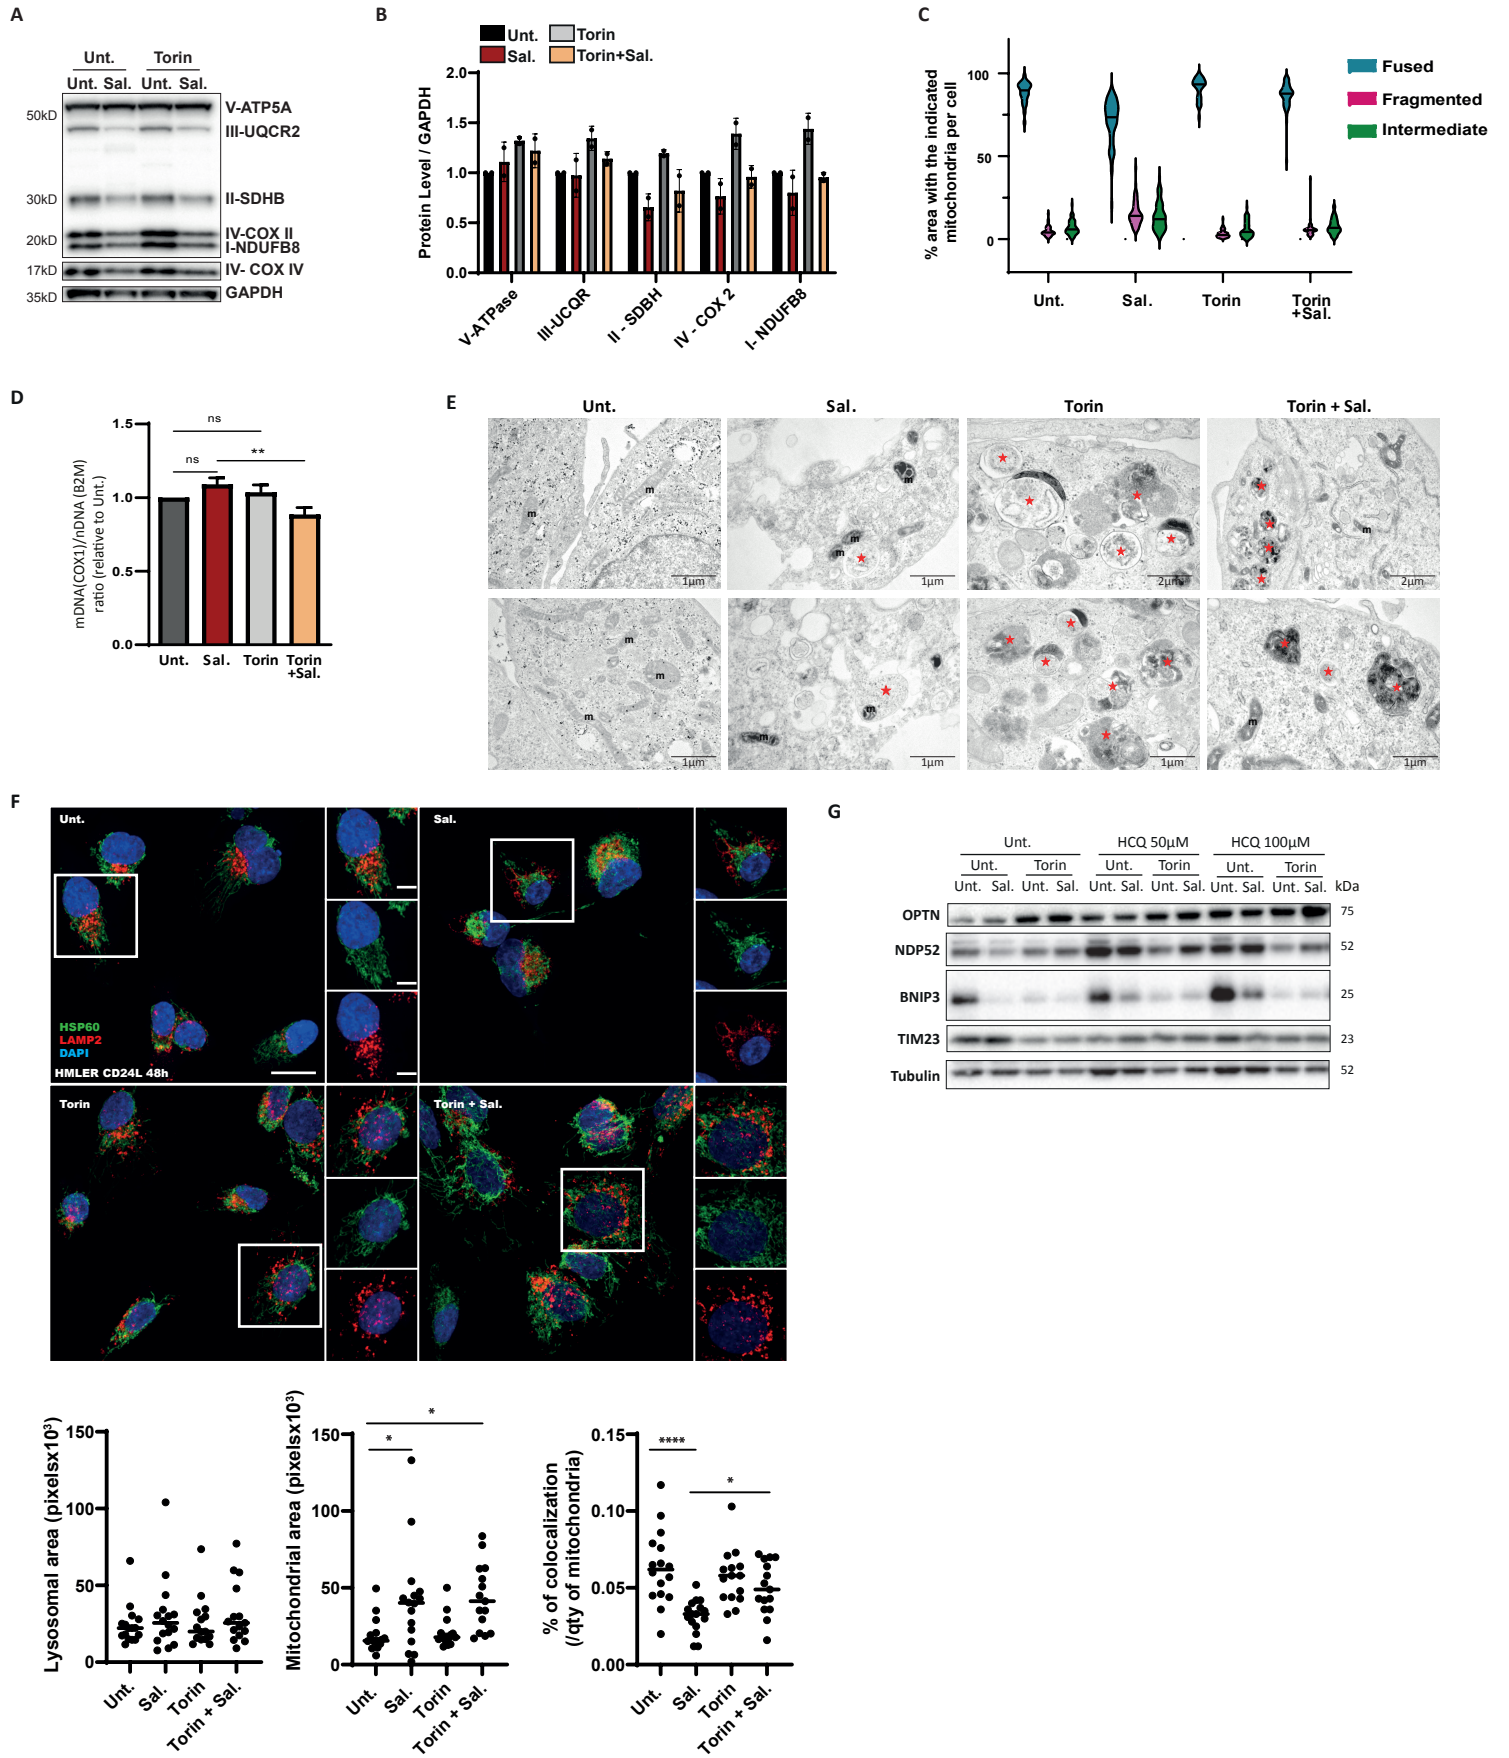

Supplement: 41419_2023_6262_MOESM2_ESM.pdf [file 41419_2023_6262_MOESM2_ESM.pdf]
