# Supplementary material for: mTOR inhibition suppresses salinomycin-induced ferroptosis in breast cancer stem cells by ironing out mitochondrial dysfunctions
Source: PubMed Central journal article supplement (PMC10651934; doi:10.1038/s41419-023-06262-5), 2023-11-15
Supplement: 41419_2023_6262_MOESM5_ESM.pdf [file 41419_2023_6262_MOESM5_ESM.pdf]

## Supplementary TABLE S3

4EBP1 (Cell Signalling #9644, WB :1/1000)  
4EBP1 - phospho (Thr37/46) (Cell Signalling #2855, WB : 1/1000 in 5% BSA)  
ATG3 (SAB3500500, Sigma Aldrich, WB :1/1000)  
ATG7 (Sigma Aldrich A2856, WB: 1:1000)  
ATG9A (PD042, MBL International, WB : 1/1000)  
BNIP3 (Santa Cruz, sc-56167, WB : 1/1000)  
BNIP3L (12393, Cell Signaling, WB : 1 :500)  
DRP1 (BD Biosciences B611113, WB : 1/1000)  
FTH (Abcam 75973, WB : 1/1000)  
GAPDH (Santa Cruz sc-47724, WB : 1:2000)  
Hsp60 (12165, Cell Signaling, WB : 1:500, IF : 1/100)  
IRP2 (Cell Signalling #37135, WB : 1/1000 in 5% BSA)  
LAMP2 (Developmental Studies Hybridoma Bank, AB\_528129, IF: 1/100)  
LC3 (Sigma L7543, WB : 1/1000)  
MFN2 (Cell Signaling, 9482, WB : 1/1000)  
NCOA4 (Santa Cruz sc-373739, WB : 1/1000)  
NDP52 (Proteintech, 12229-1-AP, WB : 1/1000)  
OPA1 (Cell Signalling, #80471, WB : 1/1000)  
OPTN (Proteintech 10837-1-AP, WB : 1/1000)  
p62 (Progen - GP62-C, WB : 1/1000)  
p70-S6K (Cell signaling #9202, WB : 1/1000)  
p70-S6K-phospho (Thr389) (Cell Signalling #9205, WB : 1:500 in 5% BSA)  
phospho-S6 (Ser240/244) (Cell signalling #5364, WB : 1/1000 in 5% BSA)  
PTGS2/COX2 (Cell signaling, 12282, WB: 1/1000)  
R-TF1/TFRC (H68.4) (ThermoFisher #13-6800, WB : 1/1000)  
Raptor (Invitrogen #42-4000, WB : 1/1000)  
S6 (Cell signalling #2217, WB : 1/1000)  
Sin1 (Cell signalling #12860, WB : 1/1000)  
TIM23 (611223, BD Transduction Laboratories, WB : 1/1000)  
TOM20 (BD Biosciences 612278, WB : 1/1000, IF : 1/75)  
TOMM40 (18409-1-AP, Proteintech, WB : 1/1000)  
Total OXPHOS Cocktail (Abcam 110411, WB : 1/1500)  
Tubuline (Sigma T5168, WB : 1/2000)  
VHL (BD Biosciences 556347, WB : 1/1000)

### Secondary Antibodies (Source, Reference)

Anti-Rabbit IgG, HRP-linked (Cell Signaling #7074, WB: 1:2000)  
Anti-Mouse IgG, HRP-linked (Cell Signaling #7076, WB: 1:2000)

### Drugs (Source, Reference)

AZD-8055 (MedChamExpress, #HY-10422)  
Compound 968 (Merck Millipore, 352010)

Deferoxamine (DFO, Sigma-Aldrich, D9533)  
Ferrostatin-1 (Fer-1, Sigma-Aldrich, SML0583-5MG)  
Lipoxstatin-1 (Lip-1, Sigma-Aldrich, SML1414-5MG)  
MHY 1485 (Sigma-Aldrich, SML0810)  
Rapamycin (Rapa., Sigma-Aldrich, R0395)  
Salinomycin (Sal, Sigma-Aldrich, S46729)  
Torin-1 (Torin, Tocris Bioscience, 4247)  
Vitamin E/ $\alpha$ -Tocopherol (VitE., Sigma-Aldrich, 258024)

#### **Chemical Reagents (Source, Reference)**

CM-H2DCF-DA (20,7'-dichlorodihydrofluorescein diacetate, Invitrogen, C6827)  
HPF (Hydroxyl Radical and Peroxynitrite Sensor, ThermoFisher H36004)  
Bodipy 581/591 C11 (Invitrogen, D3861)  
DAPI (4',6-diamidino-2-phenylindole, Invitrogen, D1306)  
FeCl<sub>3</sub> (Sigma-Aldrich, 451649)  
FerroOrange (Dojindo, F374)  
Mito-Ferro (Dojindo, M489)  
Alexa-488-Transferin (Tf, ThermoFisher Scientific, T13342)  
MitoC11 (MitoPerox, Abcam, ab146820)  
Mitotracker Green FM (ThermoFisher, M7514)  
Mitotracker CMXRos (ThermoFisher, M7512)  
NucLight Rapid Red probe (Essen BioScience, 4717)  
Cytotox Green probe (Essen BioScience, 4633)

#### **Experimental models (Source, Reference)**

HMLER CD24Low (gift from A. Puisieux, <sup>55</sup>)

#### **Software and algorithms**

GraphPad Prism 9.0 (GraphPad Software, Inc, <https://graphpad.com/scientific-software/prism/>)  
Excel 2020 (Microsoft, <https://www.office.com/>)  
ImageJ 1.52a (Wayne Rasband NIH, <https://imagej.net>)  
BD FACS DIVA 6.2 (BD Biosciences, <http://www.bdbiosciences.com/en-us/instruments/research-instruments>)  
FlowJo (BD Biosciences, <http://www.flowjo.com>)
