# Supplementary material for: mTOR inhibition suppresses salinomycin-induced ferroptosis in breast cancer stem cells by ironing out mitochondrial dysfunctions
Source: PubMed Central journal article supplement (PMC10651934; doi:10.1038/s41419-023-06262-5), 2023-11-15

Full and uncropped western blots for Fig. 1C

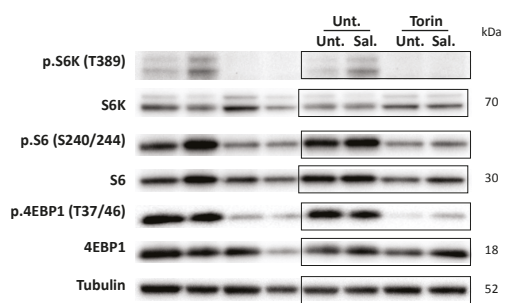

Full and uncropped western blots for Fig. 1D

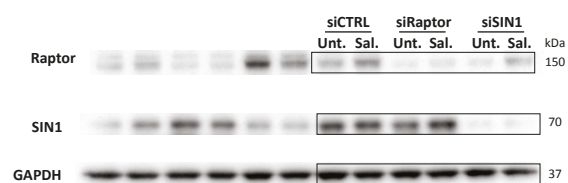

Full and uncropped western blots for Fig. S1D

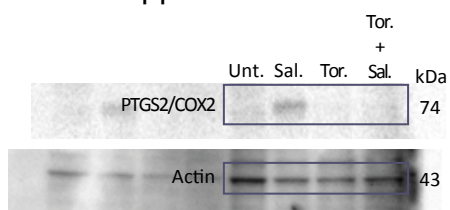

Full and uncropped western blots for Fig. S1G

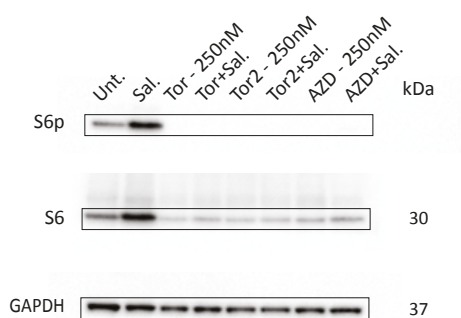

Full and uncropped western blots for Fig. 2G

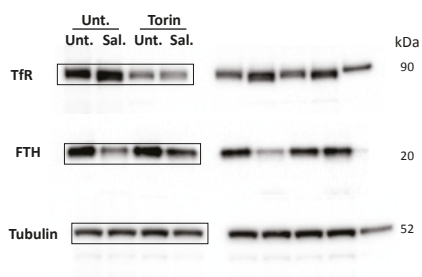

Full and uncropped western blots for Fig. S2I

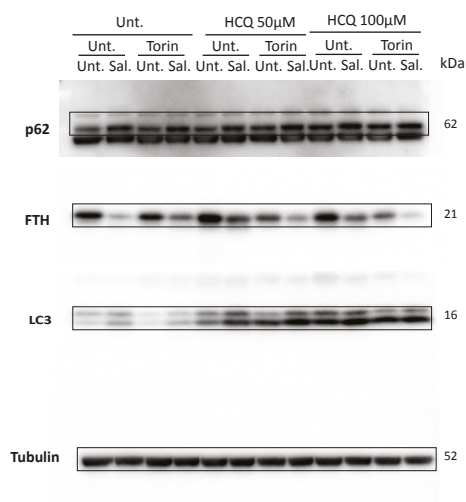

Supplement: 41419_2023_6262_MOESM6_ESM.pdf [file 41419_2023_6262_MOESM6_ESM.pdf]
